# Supplementary material for: Donor factors influencing pancreas transplant utilization decisions; using US registry data to model evolution in decision-making over time
Source: Research Square preprint supplement (doi:10.21203/rs.3.rs-7745156/v1), 2025-10-17

**Supplementary material**

**Supplementary Tables**

Supplementary Table 1: Full donor demographic variables and missing data information. Abbreviations: BMI = body mass index, CMV = cytomegalovirus, DCD = donation after circulatory death, IV = intravenous, HLA = human leukocyte antigen, ALT = alanine aminotransferase.

| **Donor characteristics** | **Pancreas not transplanted (N=119374)** | **Pancreas transplanted (N=14612)** | **Overall (N=133986)** |
| --- | --- | --- | --- |
| **Age, median [IQR], y** | 43.0 [30.0, 55.0] | 23.0 [18.0, 29.0] | 40.0 [27.0, 53.0] |
| **BMI, median [IQR], kg/m2** | 27.2 [23.4, 32.0] | 23.4 [20.9, 26.1] | 26.7 [22.9, 31.3] |
| Missing | 315 (0.3%) | 12 (0.1%) | 327 (0.2%) |
| **Ethnicity** |  |  |  |
| White | 81880 (68.6%) | 8932 (61.1%) | 90812 (67.8%) |
| Asian | 2778 (2.3%) | 296 (2.0%) | 3074 (2.3%) |
| Black | 16881 (14.1%) | 2868 (19.6%) | 19749 (14.7%) |
| Hispanic/Latino | 16265 (13.6%) | 2344 (16.0%) | 18609 (13.9%) |
| Other | 1491 (1.2%) | 164 (1.1%) | 1655 (1.2%) |
| Missing | 79 (0.1%) | 8 (0.1%) | 87 (0.1%) |
| **Sex** |  |  |  |
| Male | 71935 (60.3%) | 10104 (69.1%) | 82039 (61.2%) |
| Female | 47439 (39.7%) | 4508 (30.9%) | 51947 (38.8%) |
| **CMV status** |  |  |  |
| Negative | 45248 (37.9%) | 6034 (41.3%) | 51282 (38.3%) |
| Positive | 73329 (61.4%) | 8485 (58.1%) | 81814 (61.1%) |
| Missing | 797 (0.7%) | 93 (0.6%) | 890 (0.7%) |
| **Blood group** |  |  |  |
| A | 44486 (37.3%) | 5166 (35.4%) | 49652 (37.1%) |
| AB | 4471 (3.7%) | 219 (1.5%) | 4690 (3.5%) |
| B | 13891 (11.6%) | 1700 (11.6%) | 15591 (11.6%) |
| O | 56517 (47.3%) | 7527 (51.5%) | 64044 (47.8%) |
| Missing | 9 (0.0%) | 0 (0%) | 9 (0.0%) |
| **Cause of death** |  |  |  |
| Anoxia | 34286 (28.7%) | 3042 (20.8%) | 37328 (27.9%) |
| Cerebrovascular/stroke | 33776 (28.3%) | 1550 (10.6%) | 35326 (26.4%) |
| Drug overdose | 16354 (13.7%) | 1516 (10.4%) | 17870 (13.3%) |
| Head trauma | 30935 (25.9%) | 8165 (55.9%) | 39100 (29.2%) |
| Other | 4023 (3.4%) | 339 (2.3%) | 4362 (3.3%) |
| **DCD donor** |  |  |  |
| No | 88286 (74.0%) | 14210 (97.2%) | 102496 (76.5%) |
| Yes | 31087 (26.0%) | 402 (2.8%) | 31489 (23.5%) |
| Missing | 1 (0.0%) | 0 (0%) | 1 (0.0%) |
| **Given insulin 24 hours before clamp** |  |  |  |
| No insulin given | 63888 (53.5%) | 7178 (49.1%) | 71066 (53.0%) |
| Insulin given | 54606 (45.7%) | 7367 (50.4%) | 61973 (46.3%) |
| Missing | 880 (0.7%) | 67 (0.5%) | 947 (0.7%) |
| **Heavy alcohol use** |  |  |  |
| No heavy alcohol use | 90315 (75.7%) | 13175 (90.2%) | 103490 (77.2%) |
| Heavy alcohol use | 26696 (22.4%) | 1180 (8.1%) | 27876 (20.8%) |
| Missing | 2363 (2.0%) | 257 (1.8%) | 2620 (2.0%) |
| **Coronary artery disease** |  |  |  |
| No coronary artery disease | 112210 (94.0%) | 14568 (99.7%) | 126778 (94.6%) |
| Coronary artery disease | 6442 (5.4%) | 18 (0.1%) | 6460 (4.8%) |
| Missing | 722 (0.6%) | 26 (0.2%) | 748 (0.6%) |
| **Smoking** |  |  |  |
| No smoking | 89391 (74.9%) | 13880 (95.0%) | 103271 (77.1%) |
| Smoking | 27977 (23.4%) | 615 (4.2%) | 28592 (21.3%) |
| Missing | 2006 (1.7%) | 117 (0.8%) | 2123 (1.6%) |
| **Hypertension** |  |  |  |
| No hypertension | 79165 (66.3%) | 13996 (95.8%) | 93161 (69.5%) |
| Hypertension | 39841 (33.4%) | 603 (4.1%) | 40444 (30.2%) |
| Missing | 368 (0.3%) | 13 (0.1%) | 381 (0.3%) |
| **IV drug use** |  |  |  |
| No IV drug use | 103929 (87.1%) | 13498 (92.4%) | 117427 (87.6%) |
| IV drug use | 14236 (11.9%) | 1027 (7.0%) | 15263 (11.4%) |
| Missing | 1209 (1.0%) | 87 (0.6%) | 1296 (1.0%) |
| **Latest blood pH, median [IQR]** | 7.41 [7.36, 7.45] | 7.43 [7.39, 7.46] | 7.41 [7.36, 7.45] |
| Missing | 997 (0.8%) | 64 (0.4%) | 1061 (0.8%) |
| **Hepatitis C antibody status** |  |  |  |
| Negative | 108632 (91.0%) | 14405 (98.6%) | 123037 (91.8%) |
| Positive | 10715 (9.0%) | 206 (1.4%) | 10921 (8.2%) |
| Missing | 27 (0.0%) | 1 (0.0%) | 28 (0.0%) |
| **Number of rare HLA variants** |  |  |  |
| 0 | 91844 (76.9%) | 11159 (76.4%) | 103003 (76.9%) |
| 1 | 22477 (18.8%) | 2879 (19.7%) | 25356 (18.9%) |
| 2 | 3223 (2.7%) | 418 (2.9%) | 3641 (2.7%) |
| 3 | 529 (0.4%) | 56 (0.4%) | 585 (0.4%) |
| 4 | 357 (0.3%) | 24 (0.2%) | 381 (0.3%) |
| 5 | 535 (0.4%) | 40 (0.3%) | 575 (0.4%) |
| 6 | 409 (0.3%) | 36 (0.2%) | 445 (0.3%) |
| **Peak lipase, median [IQR], U/L** | 46.0 [21.0, 119] | 38.0 [18.0, 92.0] | 45.0 [20.0, 115] |
| Missing | 18306 (15.3%) | 68 (0.5%) | 18374 (13.7%) |
| **Peak ALT, median [IQR], U/L** | 83.0 [37.0, 229] | 63.0 [31.0, 166] | 81.0 [36.0, 221] |
| Missing | 319 (0.3%) | 1 (0.0%) | 320 (0.2%) |
| **Peak creatinine, median [IQR], U/L** | 1.41 [1.05, 2.13] | 1.25 [1.00, 1.59] | 1.40 [1.03, 2.04] |
| Missing | 120 (0.1%) | 5 (0.0%) | 125 (0.1%) |
| **Hospital stay, median [IQR], days** | 4.00 [3.00, 6.00] | 4.00 [3.00, 6.00] | 4.00 [3.00, 6.00] |
| Missing | 583 (0.5%) | 49 (0.3%) | 632 (0.5%) |
| **Inotropic support** |  |  |  |
| No inotropic support used | 74831 (62.7%) | 8317 (56.9%) | 83148 (62.1%) |
| Inotropic support used | 43513 (36.5%) | 6210 (42.5%) | 49723 (37.1%) |
| Missing | 1030 (0.9%) | 85 (0.6%) | 1115 (0.8%) |

Supplementary Table 2: Multivariable logistic regression sensitivity analysis for pancreas utilisation for the full cohort (n=133986). An event was defined as successful pancreas transplant (n=14612). This sensitivity analysis includes amylase and AST, which were excluded in the main analysis due to collinearity with lipase and ALT respectively. HbA1c is also included in this sensitivity analysis due to being excluded in the main analysis for having substantial missing data. For restricted cubic spline terms, a p-value is given for the overall impact of the variable on outcome with plots for these restricted cubic splines shown in Supplementary Figure 2. Abbreviations: CMV = cytomegalovirus, DCD = donation after circulatory death, IV = intravenous, HLA = human leukocyte antigen, BMI = body mass index, AST = aspartate aminotransferase.

| Donor variable | Adjusted Odds Ratio (95% CI) | P-value |
| --- | --- | --- |
| **Ethnicity** |  |  |
| White | Ref |  |
| Asian, Non-Hispanic | 1.111 (0.955 to 1.293) | 0.172 |
| Black, Non-Hispanic | 1.213 (1.140 to 1.290) | <0.001 |
| Hispanic/Latino | 0.850 (0.799 to 0.904) | <0.001 |
| Other | 0.733 (0.607 to 0.886) | 0.001 |
| **Sex: male** | 1.002 (0.954 to 1.052) | 0.940 |
| **CMV positive** | 0.914 (0.873 to 0.956) | <0.001 |
| **Blood group** |  |  |
| A | Ref |  |
| AB | 0.284 (0.244 to 0.331) | <0.001 |
| B | 0.923 (0.859 to 0.991) | 0.028 |
| O | 1.153 (1.101 to 1.208) | <0.001 |
| **Cause of death** |  |  |
| Anoxia | Ref |  |
| Cerebrovascular/stroke | 0.973 (0.892 to 1.060) | 0.528 |
| Drug overdose | 1.083 (0.997 to 1.177) | 0.057 |
| Head trauma | 1.059 (0.996 to 1.125) | 0.065 |
| Other | 0.730 (0.633 to 0.842) | <0.001 |
| **DCD donor** | 0.078 (0.070 to 0.087) | <0.001 |
| **Given insulin 24 hours before cross-clamp** | 0.963 (0.921 to 1.007) | 0.095 |
| **Heavy alcohol use** | 0.565 (0.525 to 0.609) | <0.001 |
| **Coronary artery disease** | 0.392 (0.238 to 0.646) | <0.001 |
| **Smoking** | 0.850 (0.768 to 0.940) | 0.002 |
| **Hypertension** | 0.583 (0.528 to 0.643) | <0.001 |
| **IV drug use** | 0.583 (0.534 to 0.637) | <0.001 |
| **Hepatitis C antibody positive** | 0.163 (0.140 to 0.191) | <0.001 |
| **Number of rare HLA variants** |  |  |
| 0 | Ref |  |
| 1 | 0.963 (0.912 to 1.017) | 0.176 |
| 2 | 0.919 (0.808 to 1.047) | 0.204 |
| 3 | 0.835 (0.597 to 1.168) | 0.293 |
| 4 | 0.620 (0.387 to 0.993) | 0.047 |
| 5 | 0.648 (0.444 to 0.945) | 0.024 |
| 6 | 0.749 (0.503 to 1.115) | 0.154 |
| **Inotropic support used** | 0.982 (0.940 to 1.027) | 0.437 |
| **RCS: BMI** | RCS terms | <0.001 |
| **RCS: Age, years** | RCS terms | <0.001 |
| **RCS: Donation date** | RCS terms | <0.001 |
| **RCS: Latest blood pH** | RCS terms | <0.001 |
| **RCS: Peak amylase** | RCS terms | <0.001 |
| **RCS: Peak AST** | RCS terms | <0.001 |
| **RCS: Peak creatinine** | RCS terms | <0.001 |
| **RCS: Hospital stay, days** | RCS terms | <0.001 |
| **RCS: HbA1c** | RCS terms | <0.001 |

Supplementary Table 3: Multivariable logistic regression model for pancreas utilisation for the full cohort (n=133986), pooled from 20 imputed datasets, as part of interaction analysis. Overall P values are shown for interaction terms between key variables (marked with *) and donation date. Plots for key variables are shown in Figure 3 with additional plots in Supplementary Figure 4. Abbreviations: DCD = donation after circulatory death, CMV = cytomegalovirus, HLA = human leukocyte antigen, BMI = body mass index, ALT = alanine aminotransferase, IV = intravenous.

| Donor variable | Adjusted Odds Ratio (95% CI) | P-value |
| --- | --- | --- |
| **DCD donor** | 0.126 (0.095 to 0.168) | <0.001 |
| **Hepatitis C antibody positive** | 0.000 (0.000 to 0.000) | <0.001 |
| **Blood group** |  |  |
| A | Ref |  |
| AB | 0.272 (0.186 to 0.398) | <0.001 |
| B | 0.973 (0.809 to 1.170) | 0.769 |
| O | 1.155 (1.023 to 1.303) | 0.020 |
| **Heavy alcohol use** | 0.446 (0.364 to 0.546) | <0.001 |
| **IV drug use** | 0.248 (0.187 to 0.330) | <0.001 |
| **Ethnicity** |  |  |
| White | Ref |  |
| Asian, Non-Hispanic | 1.012 (0.872 to 1.175) | 0.876 |
| Black, Non-Hispanic | 1.102 (1.037 to 1.170) | 0.002 |
| Hispanic/Latino | 0.821 (0.774 to 0.872) | <0.001 |
| Other | 0.683 (0.567 to 0.822) | <0.001 |
| **Sex: male** | 0.994 (0.947 to 1.043) | 0.796 |
| **CMV positive** | 0.906 (0.867 to 0.947) | <0.001 |
| **Cause of death** |  |  |
| Anoxia | Ref |  |
| Cerebrovascular/stroke | 0.974 (0.895 to 1.060) | 0.545 |
| Drug overdose | 1.069 (0.984 to 1.160) | 0.113 |
| Head trauma | 1.167 (1.099 to 1.239) | <0.001 |
| Other | 0.759 (0.660 to 0.872) | <0.001 |
| **Given insulin 24 hours before clamp** | 0.954 (0.913 to 0.996) | 0.034 |
| **Coronary artery disease** | 0.418 (0.254 to 0.690) | <0.001 |
| **Smoking** | 0.735 (0.666 to 0.812) | <0.001 |
| **Hypertension** | 0.535 (0.485 to 0.590) | <0.001 |
| **Number of rare HLA variants** |  |  |
| 0 | Ref |  |
| 1 | 0.963 (0.912 to 1.016) | 0.164 |
| 2 | 0.902 (0.795 to 1.024) | 0.112 |
| 3 | 0.821 (0.591 to 1.139) | 0.238 |
| 4 | 0.627 (0.394 to 0.999) | 0.050 |
| 5 | 0.673 (0.464 to 0.977) | 0.037 |
| 6 | 0.769 (0.520 to 1.139) | 0.191 |
| **Inotropic support used** | 0.961 (0.920 to 1.004) | 0.074 |
| **RCS: Age, years** | RCS terms |  |
| **RCS: Donation date** | RCS terms | <0.001 |
| **RCS: BMI** | RCS terms | <0.001 |
| **RCS: Peak creatinine** | RCS terms | <0.001 |
| **RCS: Peak lipase** | RCS terms | <0.001 |
| **RCS: Peak ALT** | RCS terms | <0.001 |
| **RCS: Latest blood pH** | RCS terms | <0.001 |
| **RCS: Hospital stay, days** | RCS terms | <0.001 |
| **RCS: Age, years *** | RCS terms | <0.001 |
| **RCS: BMI *** | RCS terms | 0.005 |
| **RCS: DCD donor *** | RCS terms | 0.003 |
| **RCS: Peak creatinine *** | RCS terms | 0.004 |
| RCS: **Hepatitis C positive *** | RCS terms | <0.001 |
| **RCS: Blood group *** | RCS terms | 0.897 |
| **RCS: Peak lipase *** | RCS terms | 0.825 |
| **RCS: Peak ALT *** | RCS terms | <0.001 |
| **RCS: Heavy alcohol use *** | RCS terms | 0.069 |
| **RCS: IV drug use *** | RCS terms | <0.001 |

**Supplementary Figures**

Supplementary Figure 1: Absolute number of pancreas transplants per year from 2010 to 2023.


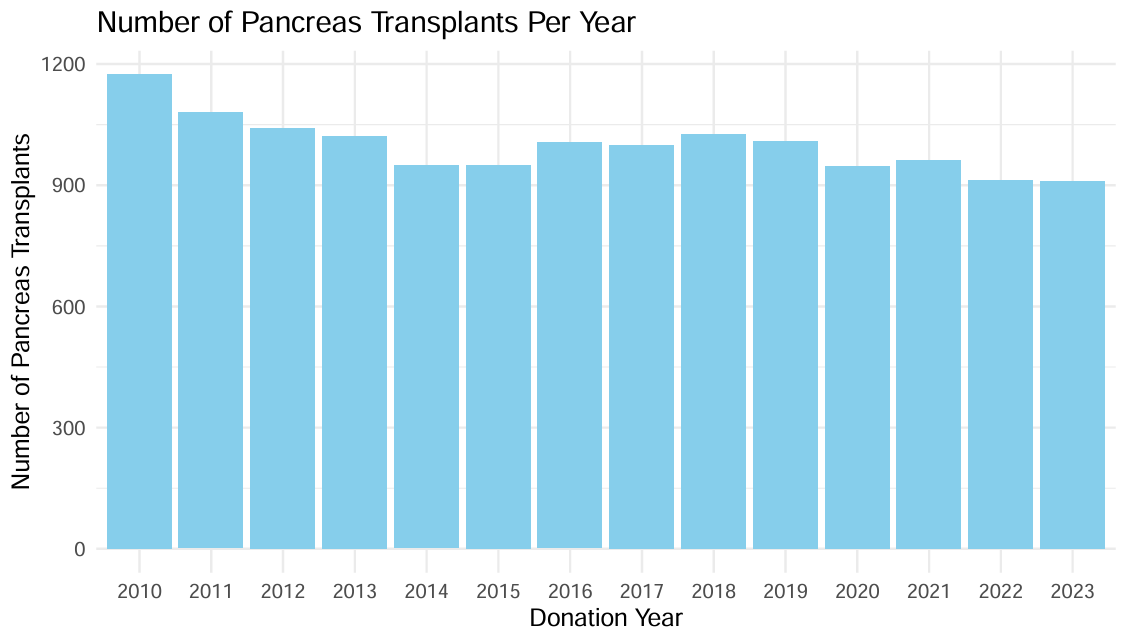


Supplementary Figure 2: Restricted cubic spline models showing association between donor variables from sensitivity analysis and pancreas utilisation. Sensitivity analysis includes amylase and AST, which were excluded due to collinearity with lipase and ALT respectively. HbA1c is also included in the sensitivity analysis and not the main analysis due to substantial missing data. Restricted cubic splines were plotted using 4 knots and were adjusted for all variables in Supplementary Table 2. A log-scaled y-axis is used for all variables for better visualisation of relationships. A log-scaled x-axis is also used for peak amylase, peak AST and peak creatinine.

A) BMI. B) Age. C) Donation date. D) Latest blood pH. E) Peak amylase. F) Peak AST. G) Peak creatinine H) Hospital stay length. I) Peak HbA1c.


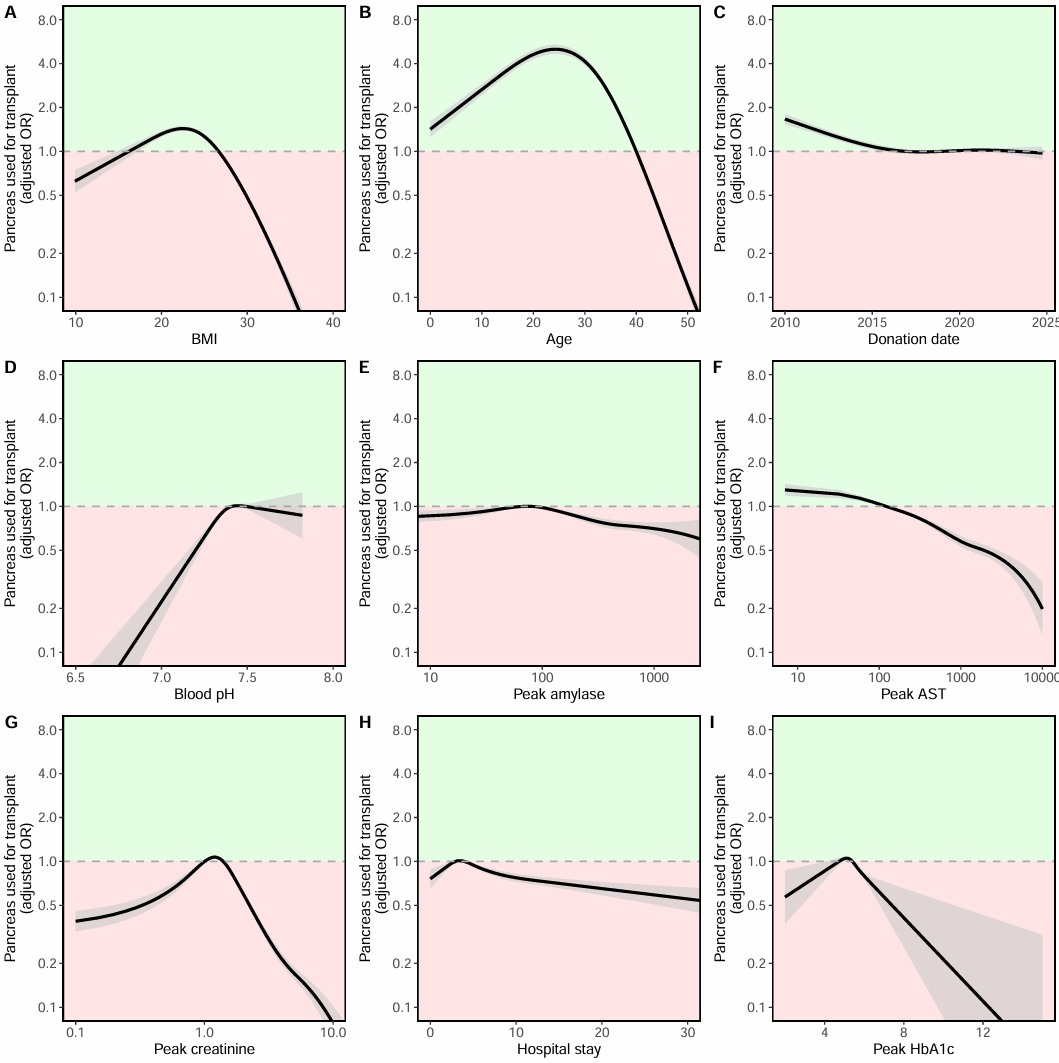


Supplementary Figure 3: Plot showing Wald statistics for variables from main analysis using ANOVA function from rms package. Values further right represent greater importance of the variable in determining utilisation decisions, with age being the most important, and sex being the least important factor.


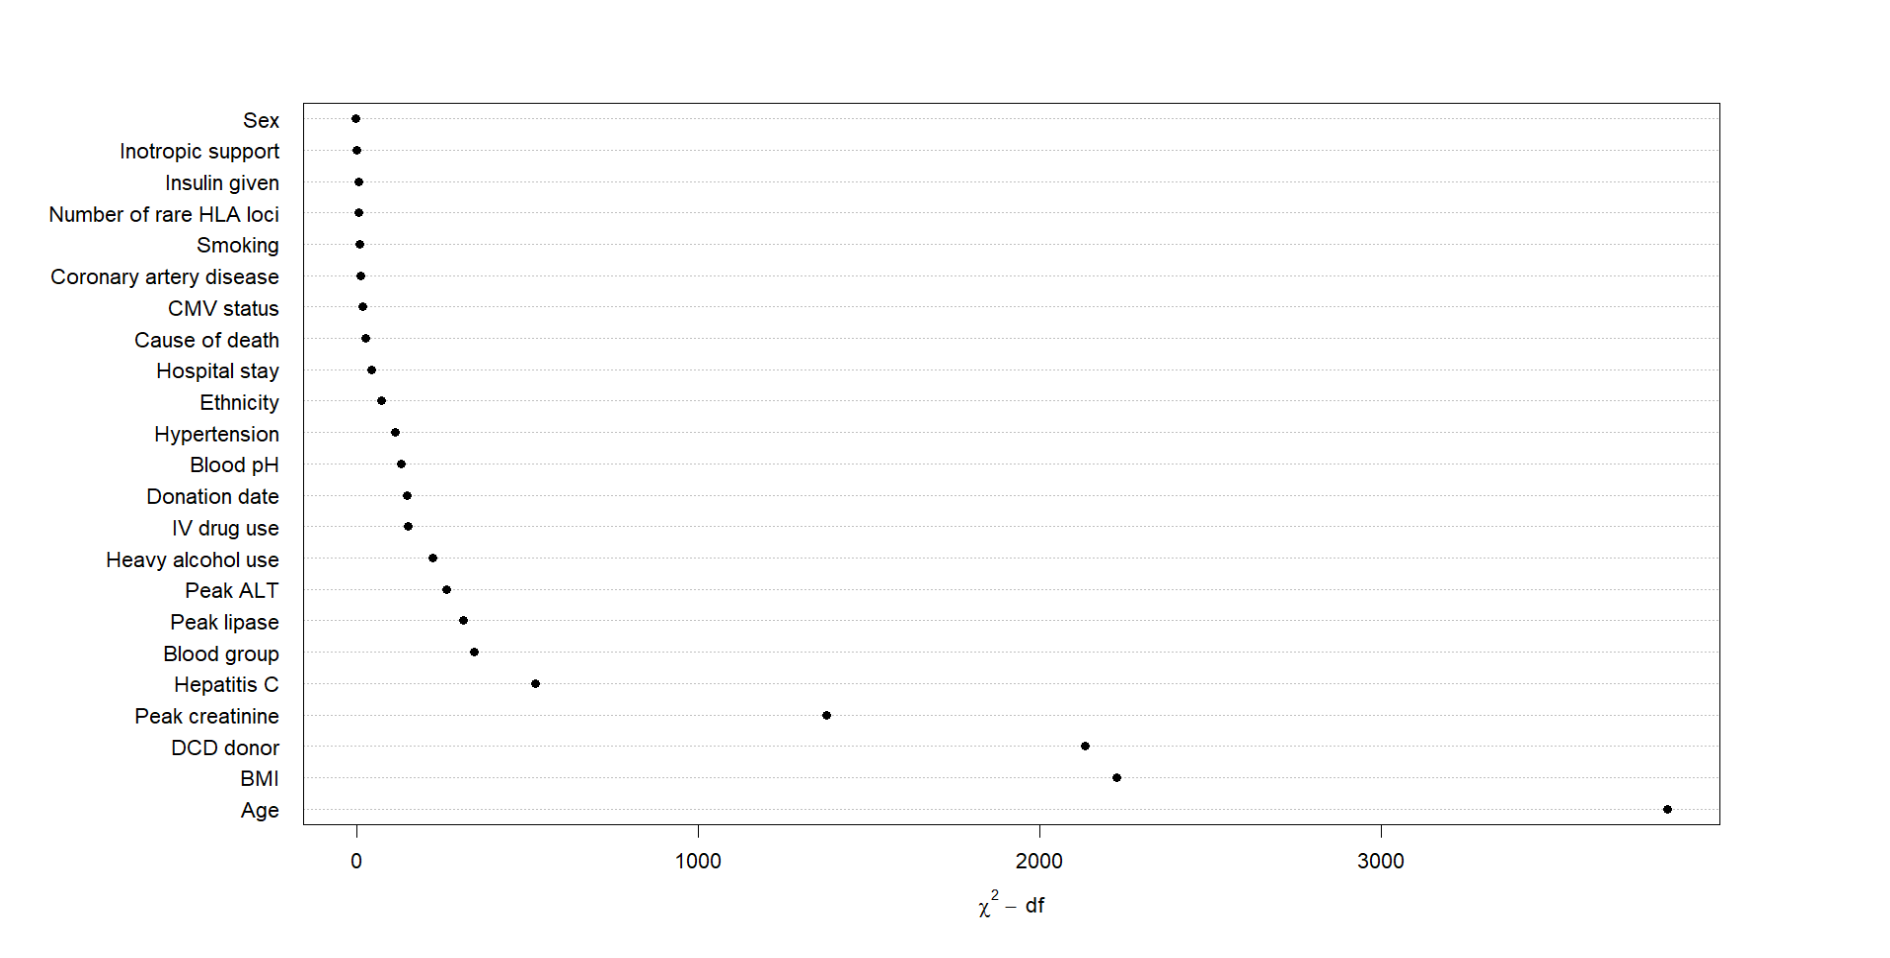


Supplementary Figure 4: Restricted cubic spline models showing interaction effects between variables and donation date on pancreas utilisation. Restricted cubic splines were plotted using 3 knots with a log scaled y-axis. Interaction models for key variables are shown in Figure 3. A) Donor blood group. B) Donor heavy alcohol use. C) Donor BMI. D) Donor peak creatinine. E) Donor peak lipase. F) Donor peak ALT


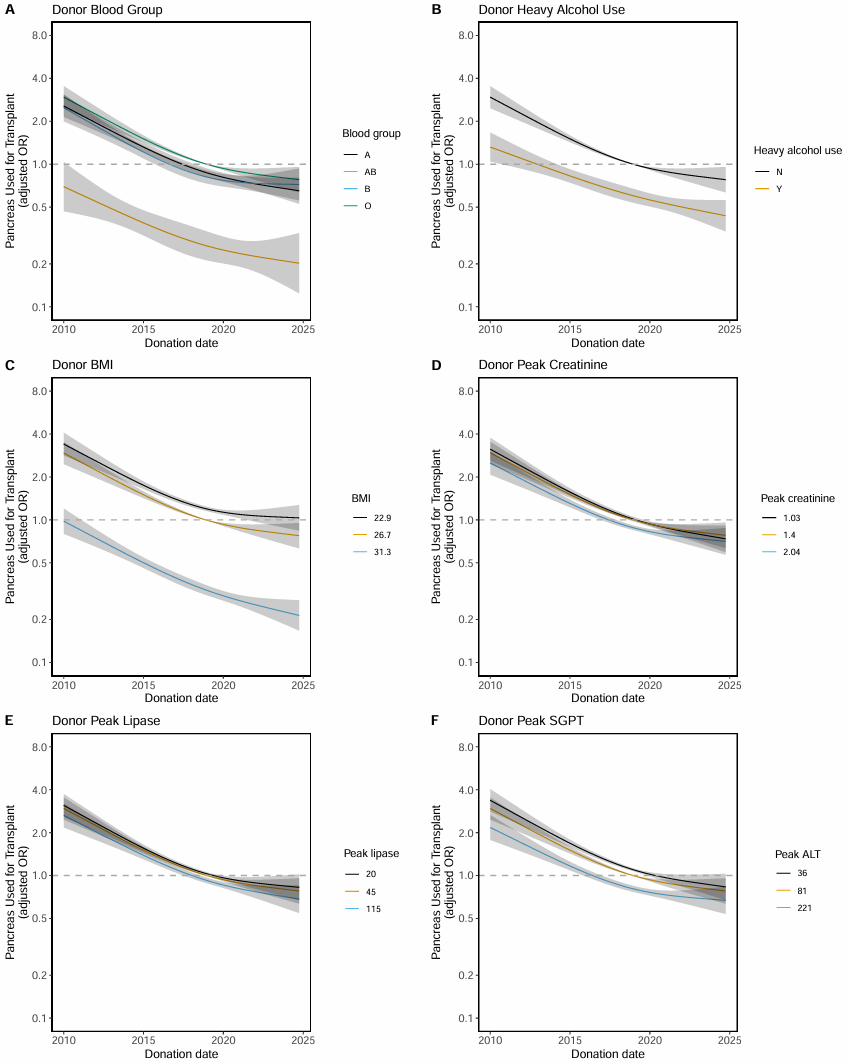


Supplementary Figure 5: Plot of centre-level DCD transplant percentage by total transplant volume over the study period. Blue line represents a LOESS smoothed trend with 95% confidence interval (grey band). Centres performing less than 5 pancreas transplants per year were excluded as DCD utilisation percentage would be too unstable for comparison.


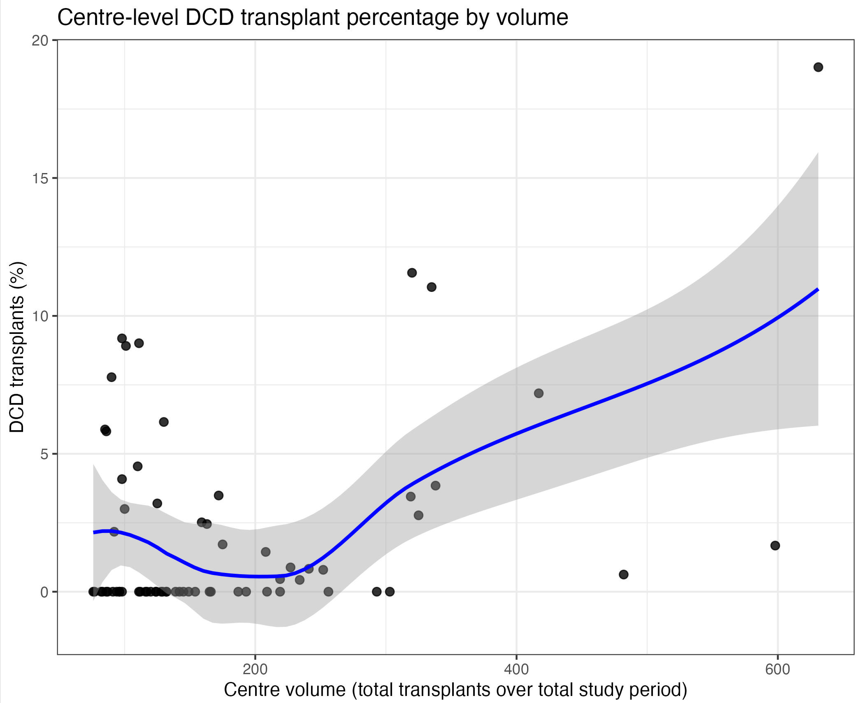


Supplementary Figure 6: Counts of annual DCD donors by retrieval type over the study period. A) DCD donors stratified by retrieval type in the full cohort. B) DCD donors stratified by retrieval type in those utilised for transplantation. Abbreviations: SRR = super rapid recovery, NRP = normothermic regional perfusion.


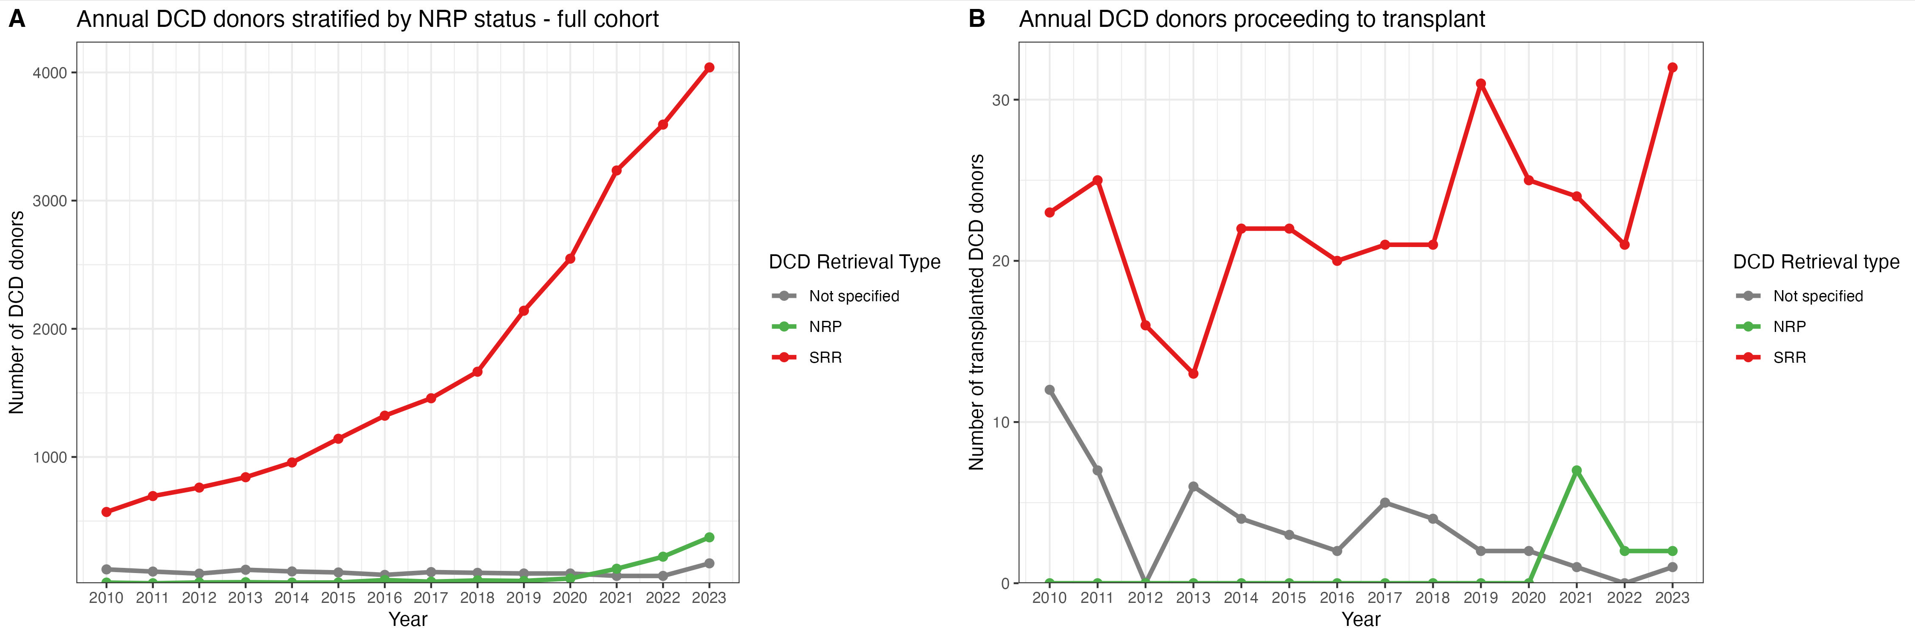


Supplementary Figure 7: Breakdown of HCV antibody positive donors by HCV NAT status. A&B) HCV antibody positive donors in the full cohort (including those donors where the pancreas was not transplanted). C&D) HCV antibody positive donors where the pancreas was transplanted. Counts (panel A&C) and proportions (B&D) are displayed. Proportions are only displayed from 2017 onwards, as prior to this too few HCV antibody positive donor pancreas transplants took place.


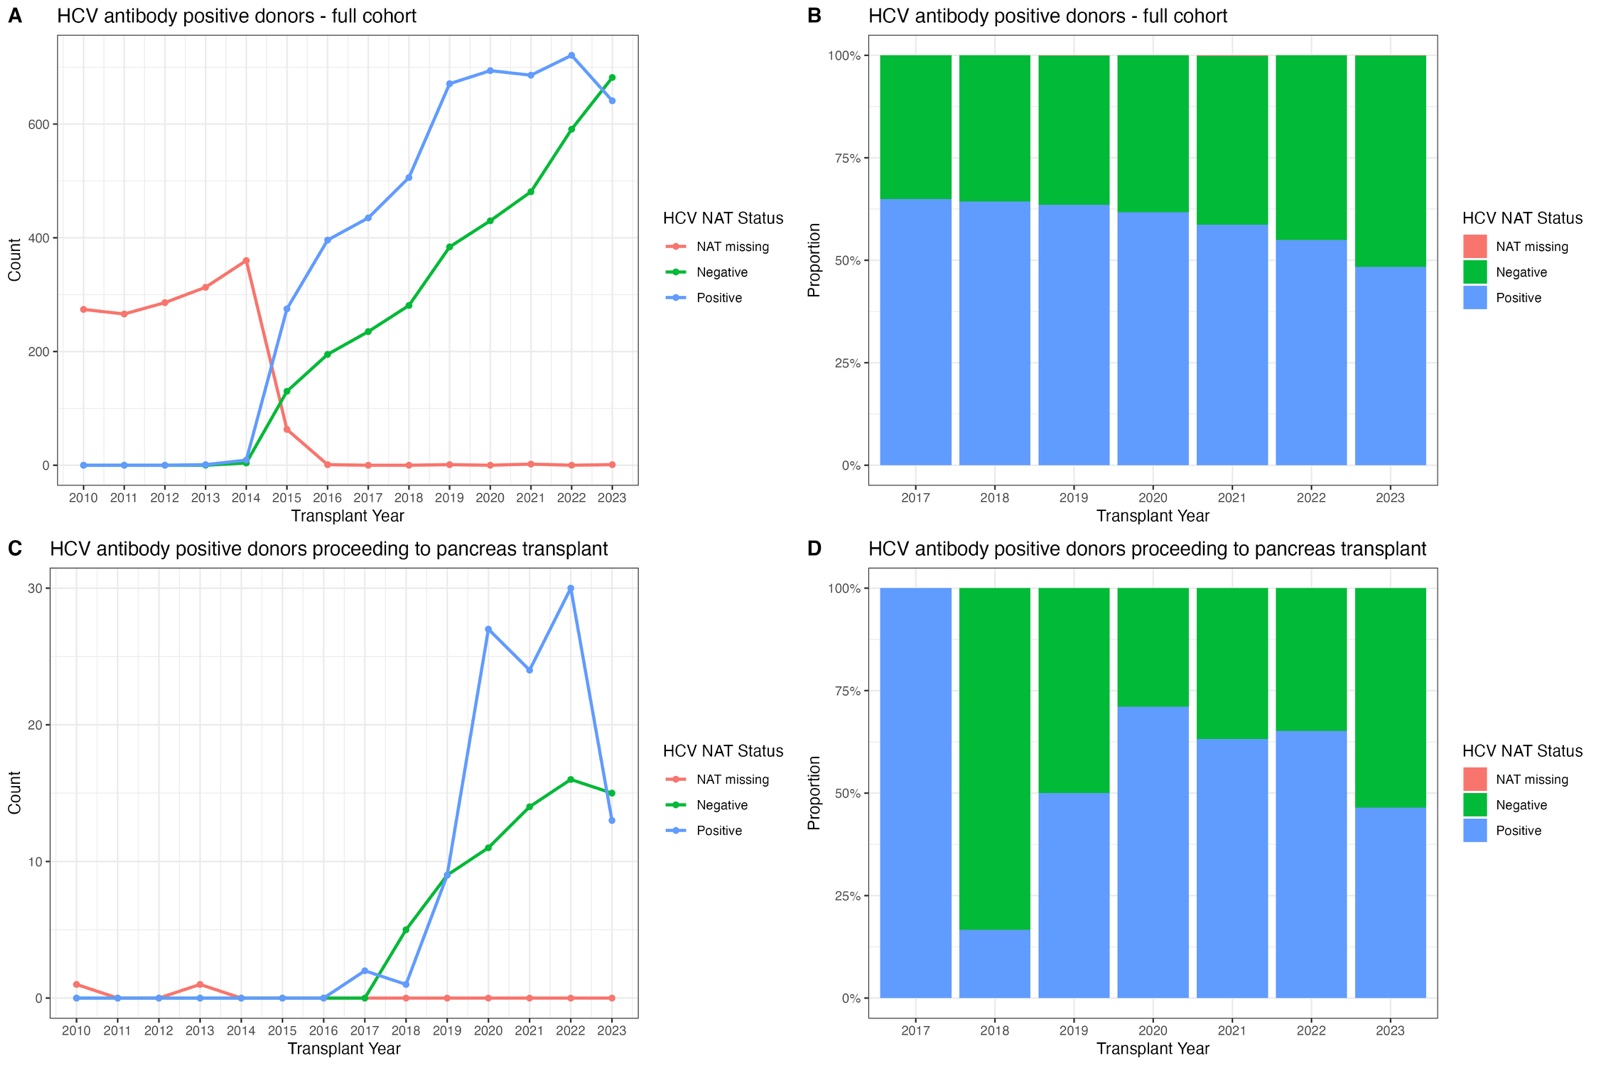

Supplement: Supplementary file 1 [file 9ea999c8e8dd9dea7269da42.docx]
